# Supplementary material for: It’s made a really hard situation even more difficult: The impact of COVID-19 on families of children with chronic illness
Source: PubMed Central journal article supplement (PMC9436103; doi:10.1371/journal.pone.0273622), 2022-09-01

# PLOS ONE

## It's made a really hard situation even more difficult: The impact of COVID-19 on families of children with chronic illness

--Manuscript Draft--

|                              |                                                                                                                                                                                                                                                                                                                                                                                                                                                                                                                                                                                                                                                                                                                                                                                                                                                                                                                                                                                                                                                                                                                                                                                                                                                                                                                                                                                                                                                                                                                                                                                                                                                                                                                                                                                                                                                                                                                                                                                                                                                                                                                                                                                                                                                                                                                                                                                       |
|------------------------------|---------------------------------------------------------------------------------------------------------------------------------------------------------------------------------------------------------------------------------------------------------------------------------------------------------------------------------------------------------------------------------------------------------------------------------------------------------------------------------------------------------------------------------------------------------------------------------------------------------------------------------------------------------------------------------------------------------------------------------------------------------------------------------------------------------------------------------------------------------------------------------------------------------------------------------------------------------------------------------------------------------------------------------------------------------------------------------------------------------------------------------------------------------------------------------------------------------------------------------------------------------------------------------------------------------------------------------------------------------------------------------------------------------------------------------------------------------------------------------------------------------------------------------------------------------------------------------------------------------------------------------------------------------------------------------------------------------------------------------------------------------------------------------------------------------------------------------------------------------------------------------------------------------------------------------------------------------------------------------------------------------------------------------------------------------------------------------------------------------------------------------------------------------------------------------------------------------------------------------------------------------------------------------------------------------------------------------------------------------------------------------------|
| <b>Manuscript Number:</b>    | PONE-D-22-14320                                                                                                                                                                                                                                                                                                                                                                                                                                                                                                                                                                                                                                                                                                                                                                                                                                                                                                                                                                                                                                                                                                                                                                                                                                                                                                                                                                                                                                                                                                                                                                                                                                                                                                                                                                                                                                                                                                                                                                                                                                                                                                                                                                                                                                                                                                                                                                       |
| <b>Article Type:</b>         | Research Article                                                                                                                                                                                                                                                                                                                                                                                                                                                                                                                                                                                                                                                                                                                                                                                                                                                                                                                                                                                                                                                                                                                                                                                                                                                                                                                                                                                                                                                                                                                                                                                                                                                                                                                                                                                                                                                                                                                                                                                                                                                                                                                                                                                                                                                                                                                                                                      |
| <b>Full Title:</b>           | It's made a really hard situation even more difficult: The impact of COVID-19 on families of children with chronic illness                                                                                                                                                                                                                                                                                                                                                                                                                                                                                                                                                                                                                                                                                                                                                                                                                                                                                                                                                                                                                                                                                                                                                                                                                                                                                                                                                                                                                                                                                                                                                                                                                                                                                                                                                                                                                                                                                                                                                                                                                                                                                                                                                                                                                                                            |
| <b>Short Title:</b>          | The impact of COVID-19 on families of children with chronic illness                                                                                                                                                                                                                                                                                                                                                                                                                                                                                                                                                                                                                                                                                                                                                                                                                                                                                                                                                                                                                                                                                                                                                                                                                                                                                                                                                                                                                                                                                                                                                                                                                                                                                                                                                                                                                                                                                                                                                                                                                                                                                                                                                                                                                                                                                                                   |
| <b>Corresponding Author:</b> | Jordana McLoone, PhD<br>University of New South Wales - Kensington Campus: University of New South Wales<br>Kensington, New South Wales AUSTRALIA                                                                                                                                                                                                                                                                                                                                                                                                                                                                                                                                                                                                                                                                                                                                                                                                                                                                                                                                                                                                                                                                                                                                                                                                                                                                                                                                                                                                                                                                                                                                                                                                                                                                                                                                                                                                                                                                                                                                                                                                                                                                                                                                                                                                                                     |
| <b>Keywords:</b>             | COVID-19, pediatric, childhood chronic illness, psychosocial, qualitative                                                                                                                                                                                                                                                                                                                                                                                                                                                                                                                                                                                                                                                                                                                                                                                                                                                                                                                                                                                                                                                                                                                                                                                                                                                                                                                                                                                                                                                                                                                                                                                                                                                                                                                                                                                                                                                                                                                                                                                                                                                                                                                                                                                                                                                                                                             |
| <b>Abstract:</b>             | <p><b>Objective:</b> For over two years, the global COVID-19 pandemic has forced major transformations on our health, social, and educational systems, with concomitant impacts on mental health. This study aimed to understand the unique and additional challenges faced by children with chronic illness and their families during the COVID-19 era.</p> <p><b>Method:</b> Parents of children receiving treatment for a chronic illness within the neurology, cancer, renal and respiratory clinics of Sydney Children's Hospital were invited to participate. We used qualitative methodology, including a semi-structured interview guide, verbatim transcription, and thematic analysis supported by QSR NVivo.</p> <p><b>Results:</b> Thirteen parents of children receiving tertiary-level care, for nine chronic illnesses, participated. Parents reported intense fears relating to their ill child's additional vulnerabilities, which included their risk of developing severe COVID-19 disease and the potential impact of COVID-19-related disruptions to accessing clinical care, medications, allied health support and daily care protocols should their parent contract COVID-19. Parents perceived telehealth as a highly convenient and preferred method for ongoing management of less complex healthcare needs. Parents reported that the accrual of additional stressors and responsibilities during the pandemic, experienced in combination with restricted social interaction and reduced access to usual support networks was detrimental to their own mental health. Hospital-based visitation restrictions reduced emotional support, coping, and resilience for both parents and children and in some cases led to marital discord, sibling distress, and financial loss. Supportive factors included increased time spent together at home during the pandemic and improved hygiene practices at school, which dramatically reduced the incidence of non-COVID-19-related communicable illnesses in chronically ill children.</p> <p><b>Discussion :</b> For families caring for a chronically ill child, COVID-19 made a difficult situation harder. The pandemic has highlighted the need for targeted psychosocial intervention for vulnerable families, to mitigate current mental health burden and prevent chronic psychological distress.</p> |
| <b>Order of Authors:</b>     | Jordana McLoone, PhD<br>Claire E Wakefield<br>Glenn M Marshall<br>Kristine Pierce<br>Adam Jaffe<br>Ann Bye<br>Sean E Kennedy<br>Donna Drew<br>Raghu Lingam                                                                                                                                                                                                                                                                                                                                                                                                                                                                                                                                                                                                                                                                                                                                                                                                                                                                                                                                                                                                                                                                                                                                                                                                                                                                                                                                                                                                                                                                                                                                                                                                                                                                                                                                                                                                                                                                                                                                                                                                                                                                                                                                                                                                                            |

| Additional Information:                                                                                                                                                                                                                                                                                                                                                                                                                                                                                                                                                                                                                                                                                                                                                                                                                                                                                                                                                                                                                                                                                                                                                                                                                                                                                                                                                             |                                                                     |
|-------------------------------------------------------------------------------------------------------------------------------------------------------------------------------------------------------------------------------------------------------------------------------------------------------------------------------------------------------------------------------------------------------------------------------------------------------------------------------------------------------------------------------------------------------------------------------------------------------------------------------------------------------------------------------------------------------------------------------------------------------------------------------------------------------------------------------------------------------------------------------------------------------------------------------------------------------------------------------------------------------------------------------------------------------------------------------------------------------------------------------------------------------------------------------------------------------------------------------------------------------------------------------------------------------------------------------------------------------------------------------------|---------------------------------------------------------------------|
| Question                                                                                                                                                                                                                                                                                                                                                                                                                                                                                                                                                                                                                                                                                                                                                                                                                                                                                                                                                                                                                                                                                                                                                                                                                                                                                                                                                                            | Response                                                            |
| <p><b>Financial Disclosure</b></p> <p>Enter a financial disclosure statement that describes the sources of funding for the work included in this submission. Review the <a href="#">submission guidelines</a> for detailed requirements. View published research articles from <a href="#">PLOS ONE</a> for specific examples.</p> <p>This statement is required for submission and <b>will appear in the published article</b> if the submission is accepted. Please make sure it is accurate.</p> <p><b>Unfunded studies</b><br/>Enter: <i>The author(s) received no specific funding for this work.</i></p> <p><b>Funded studies</b><br/>Enter a statement with the following details:</p> <ul style="list-style-type: none"> <li>• Initials of the authors who received each award</li> <li>• Grant numbers awarded to each author</li> <li>• The full name of each funder</li> <li>• URL of each funder website</li> <li>• Did the sponsors or funders play any role in the study design, data collection and analysis, decision to publish, or preparation of the manuscript?</li> <li>• <b>NO</b> - Include this sentence at the end of your statement: <i>The funders had no role in study design, data collection and analysis, decision to publish, or preparation of the manuscript.</i></li> <li>• <b>YES</b> - Specify the role(s) played.</li> </ul> <p>* typeset</p> | <p>The author(s) received no specific funding for this work.</p>    |
| <p><b>Competing Interests</b></p> <p>Use the instructions below to enter a competing interest statement for this submission. On behalf of all authors, disclose any <a href="#">competing interests</a> that could be perceived to bias this work—acknowledging all financial support and any other relevant financial or non-financial competing interests.</p>                                                                                                                                                                                                                                                                                                                                                                                                                                                                                                                                                                                                                                                                                                                                                                                                                                                                                                                                                                                                                    | <p>The authors have declared that no competing interests exist.</p> |

This statement is **required** for submission and **will appear in the published article** if the submission is accepted. Please make sure it is accurate and that any funding sources listed in your Funding Information later in the submission form are also declared in your Financial Disclosure statement.

View published research articles from [PLOS ONE](#) for specific examples.

**NO authors have competing interests**

Enter: *The authors have declared that no competing interests exist.*

**Authors with competing interests**

Enter competing interest details beginning with this statement:

*I have read the journal's policy and the authors of this manuscript have the following competing interests: [insert competing interests here]*

\* typeset

**Ethics Statement**

Enter an ethics statement for this submission. This statement is required if the study involved:

- Human participants
- Human specimens or tissue
- Vertebrate animals or cephalopods
- Vertebrate embryos or tissues
- Field research

Write "N/A" if the submission does not require an ethics statement.

General guidance is provided below. Consult the [submission guidelines](#) for detailed instructions. **Make sure that all information entered here is included in the**

The Sydney Children's Hospital Network ethics board granted ethical approval (2020/ETH02027). Participants provided written consent.

**Methods section of the manuscript.**

**Format for specific study types**

**Human Subject Research (involving human participants and/or tissue)**

- Give the name of the institutional review board or ethics committee that approved the study
- Include the approval number and/or a statement indicating approval of this research
- Indicate the form of consent obtained (written/oral) or the reason that consent was not obtained (e.g. the data were analyzed anonymously)

**Animal Research (involving vertebrate animals, embryos or tissues)**

- Provide the name of the Institutional Animal Care and Use Committee (IACUC) or other relevant ethics board that reviewed the study protocol, and indicate whether they approved this research or granted a formal waiver of ethical approval
- Include an approval number if one was obtained
- If the study involved *non-human primates*, add *additional details* about animal welfare and steps taken to ameliorate suffering
- If anesthesia, euthanasia, or any kind of animal sacrifice is part of the study, include briefly which substances and/or methods were applied

**Field Research**

Include the following details if this study involves the collection of plant, animal, or other materials from a natural setting:

- Field permit number
- Name of the institution or relevant body that granted permission

**Data Availability**

Authors are required to make all data underlying the findings described fully available, without restriction, and from the time of publication. PLOS allows rare exceptions to address legal and ethical concerns. See the [PLOS Data Policy](#) and [FAQ](#) for detailed information.

No - some restrictions will apply

A Data Availability Statement describing where the data can be found is required at submission. Your answers to this question constitute the Data Availability Statement and **will be published in the article**, if accepted.

**Important:** Stating 'data available on request from the author' is not sufficient. If your data are only available upon request, select 'No' for the first question and explain your exceptional situation in the text box.

Do the authors confirm that all data underlying the findings described in their manuscript are fully available without restriction?

**Describe where the data may be found in full sentences. If you are copying our sample text, replace any instances of XXX with the appropriate details.**

- If the data are **held or will be held in a public repository**, include URLs, accession numbers or DOIs. If this information will only be available after acceptance, indicate this by ticking the box below. For example: *All XXX files are available from the XXX database (accession number(s) XXX, XXX).*
- If the data are all contained **within the manuscript and/or Supporting Information files**, enter the following: *All relevant data are within the manuscript and its Supporting Information files.*
- If neither of these applies but you are able to provide **details of access elsewhere**, with or without limitations, please do so. For example:

*Data cannot be shared publicly because of [XXX]. Data are available from the XXX Institutional Data Access / Ethics Committee (contact via XXX) for researchers who meet the criteria for access to confidential data.*

*The data underlying the results*

Data cannot be shared publicly in order to uphold the confidentiality of participants who have shared confidential medical information pertaining to children. Data are available from the corresponding author, provided written permission has been obtained from the named Ethics Committee.

*presented in the study are available from (include the name of the third party and contact information or URL).*

- This text is appropriate if the data are owned by a third party and authors do not have permission to share the data.

\* typeset

Additional data availability information:

1 ***It's made a really hard situation even more difficult: The impact of COVID-19 on***  
2 **families of children with chronic illness**

3

4 **Short title:** The impact of COVID-19 on families of children with chronic illness

5

6 **Authors:**

7 Jordana McLoone<sup>1,2</sup>, Claire E. Wakefield<sup>1,2</sup>, Glenn M. Marshall<sup>3</sup>, Kristine Pierce<sup>1</sup>,

8 Adam Jaffe<sup>1,4</sup>, Ann Bye<sup>1</sup>, Sean E Kennedy<sup>1,5</sup>, Donna Drew<sup>3</sup>, and Raghu Lingam.<sup>1</sup>

9

10 **Affiliations:**

11 1. School of Clinical Medicine, UNSW Medicine and Health, UNSW Sydney,

12 Sydney, New South Wales, Australia

13 2. Behavioural Sciences Unit, Kids Cancer Centre, Sydney Children's

14 Hospital, Sydney, New South Wales, Australia

15 3. Kids Cancer Centre, Sydney Children's Hospital, Sydney, New South

16 Wales, Australia

17 4. Respiratory Department, Sydney Children's Hospital, Randwick, New

18 South Wales, Australia

19 5. Nephrology Department, Sydney Children's Hospital, Randwick, New

20 South Wales, Australia

21

22 **Corresponding author:** Dr Jordana McLoone; J.McLoone@unsw.edu.au

23

24 **Keywords:**

25 COVID-19, pediatric, childhood chronic illness, psychosocial, qualitative

## Abstract

26

27

28 **Objective:** For over two years, the global COVID-19 pandemic has forced major  
29 transformations on ~~our~~ health, social, and educational systems, with concomitant  
30 impacts on mental health. This study aimed to understand the unique and additional  
31 challenges faced by children with chronic illness and their families during the  
32 COVID-19 era.

33 **Method:** Parents of children receiving treatment for a chronic illness within the  
34 neurology, cancer, renal and respiratory clinics of Sydney Children's Hospital were  
35 invited to participate. We used qualitative methodology, including a semi-structured  
36 interview guide, verbatim transcription, and thematic analysis supported by QSR  
37 NVivo.

38 **Results:** Thirteen parents of children receiving tertiary-level care, for nine chronic  
39 illnesses, participated. Parents reported intense fears relating to their ill child's  
40 additional vulnerabilities, which included their risk of developing severe COVID-19  
41 disease and the potential impact of COVID-19-related disruptions to accessing  
42 clinical care, medications, allied health support and daily care protocols should their  
43 parent contract COVID-19. Parents perceived telehealth as a highly convenient and  
44 preferred method for ongoing management of less complex healthcare needs. Parents  
45 reported that the accrual of additional stressors and responsibilities during the  
46 pandemic, experienced in combination with restricted social interaction and reduced  
47 access to usual support networks was detrimental to their own mental health.  
48 Hospital-based visitation restrictions reduced emotional support, coping, and  
49 resilience for both parents and children and in some cases led to marital discord,  
50 sibling distress, and financial loss. Supportive factors included increased time spent



51 together at home during the pandemic and improved hygiene practices at school,  
52 which dramatically reduced the incidence of non-COVID-19-related communicable  
53 illnesses in chronically ill children.

54 **Discussion:** For families caring for a chronically ill child, COVID-19 made a difficult  
55 situation harder. The pandemic has highlighted the need for targeted psychosocial  
56 intervention for vulnerable families, to mitigate current mental health burden and  
57 prevent chronic psychological distress.

58 Globally, COVID-19 has caused disruptions to the clinical management of chronic  
59 childhood illnesses, including reduced access to screening, diagnostic and therapeutic  
60 services, surgery, essential medications, and follow-up surveillance (1-4). Arising in  
61 parallel with the medical challenges of the pandemic are immense changes to the  
62 social landscape. The lifestyle and needs of the child, including education and peer  
63 interactions, have been curbed by social isolation and school closures (5-8). For  
64 children with a chronic illness, who already face a disproportionate level of  
65 psychosocial burden (9), it is expected that this confluence of factors may result in  
66 additional consequences compared to the general population (10).

67

68 Across childhood chronic illnesses, parents fill gaps in fragmented and uncoordinated  
69 healthcare systems, functioning as case managers, medical record keepers, and patient  
70 advocates. The pandemic required parents to rapidly navigate their child's new care  
71 pathways, as health systems became overwhelmed and healthcare delivery models  
72 pivoted to telehealth and virtual care (11, 12). Simultaneously, workplaces and  
73 schools also transitioned to virtual sites, with little time for planning, piloting, or  
74 training. Up-skilling to new work platforms, procedures, and home-learning  
75 responsibilities, while caring for a chronically ill child, is likely to have placed parents  
76 under unprecedented levels of pressure. Not surprisingly, emerging evidence indicates  
77 that parents of children with underlying health conditions have been experiencing  
78 greater stress than parents of healthy children during the pandemic (13, 14).

79

80 Given the vital role families play in the health of children with chronic illness, a  
81 deeper understanding of their pandemic experiences is needed to ensure that  
82 evidence-based research guides decision-makers as they rapidly develop and deploy

83 new services, and also re-imagine what a return to a new normal might look like for  
84 child healthcare services. This study therefore explored the impact of COVID-19 on  
85 families of children with chronic illness.

86

## 87 **Method**

88

89 We used an explorative, qualitative methodology to obtain nuanced insights into the  
90 experiences of children with chronic illness and their families during the COVID-19  
91 pandemic. We first conducted a narrative literature review of the emerging literature  
92 on COVID-19 and its impact on children with disability or illness. This review was  
93 guided by the Economic and Social Research Council framework (15) and we  
94 presented this to a multidisciplinary panel, including five pediatric specialists, a  
95 behavioral scientist, and a parent consumer. The expert panel reviewed the literature  
96 and discussed the potential issues relevant to children with chronic illness in the  
97 context of the pandemic and developed a semi-structured interview guide through an  
98 iterative process. The final interview guide explored families' experiences of the  
99 COVID-19 pandemic and how their access to medical care, education, and social  
100 support had been impacted. The interview also explored the mental health impact of  
101 caring for a chronically ill child during a pandemic, as well as the mental health  
102 impacts for other family members, including the child with chronic illness and their  
103 sibling(s). At the conclusion of the interview we collected demographic items (e.g.  
104 age and sex of each family member).

105

106 First author JM (PhD), who has over a decade of qualitative research experience,  
107 interviewed families between November, 2020 and September, 2021. We audio-

108 recorded interviews, which were professionally transcribed verbatim. We organized  
109 coded passages into themes and analysis was guided by the Braun and Clarke  
110 approach (17). We used QSR NVivo 12 software to support data coding and analysis  
111 (18). We used the COREQ (19) checklist to promote accurate reporting of qualitative  
112 studies. The Sydney Children's Hospital Network ethics board granted ethical  
113 approval (2020/ETH02027).

114

### 115 *Sample*

116 We invited parents of children who a) were currently less than 16 years of age, b) had  
117 received treatment at Sydney Children's Hospital (SCH) within the past year, and c)  
118 were diagnosed with a chronic illness (a persistent illness requiring long term  
119 management), to participate in the study. SCH clinics including neurology, renal,  
120 respiratory and cancer, were asked to provide the contact details of families who met  
121 the study's eligibility criteria and were also purposively selected to provide a range of  
122 experiences, including recently diagnosed/long term patients, urban/rural, and  
123 severe/moderate disease. We sent families an invitation letter and consent form via  
124 mail and telephoned two weeks later to further explain the study and confirm whether  
125 or not a parent was interested in participating.

126

### 127 *COVID-19 context*

128 The COVID-19 context in which these interviews were conducted was as follows.  
129 Sydney Children's Hospital is located in the Australian state of New South Wales  
130 (NSW). NSW has a population of over 8 million residents, yet between 1 January  
131 2020 and 1 June 2021, reported only 5,587 cases of COVID-19. There were 54 deaths  
132 during this period, with 13 of these deaths occurring outside of aged care services

133 [16]. For many months, there were zero to few cases of community transmission.  
134 Schools were “closed” for approximately six weeks, however the children of essential  
135 workers continued to be allowed to attend school during this period.

136

## 137 **Results**

138

139 Thirty families were invited to participate. Of these, 13 mothers participated (43%  
140 response rate), see Table 1. Interviews were, on average, 42 minutes in length (range:  
141 17–61 minutes). Five major themes were identified; COVID-19 specific concerns and  
142 impacts on medical care, mental health, support, and education. These themes are  
143 explored in detail below and illustrated in Figure 1.

144

145 Fig 1: Complexity diagram representing the inter-relatedness of factors impacting  
146 families of children with chronic illness during the COVID-19 pandemic.

147

### 148 ***COVID-19 specific concerns***

149 Parents reported that the pandemic had been a highly stressful period and described  
150 how, for their families, the pandemic stress was borne in addition to multiple other  
151 stressors. *“I mean things are already stressful in this house - a new baby and a  
152 chronically ill kid and you throw in COVID and job loss ...things were intense a lot  
153 here.”* (ID 09, child with end stage kidney failure).

154

155 Parents of chronically ill children reported general feelings of uncertainty and fear, as  
156 well as fears unique to their child’s chronic health condition. *“I was terrified at the  
157 beginning of the pandemic. I just thought every time [my son] gets a cold he ends up*

158 *in the hospital and I just thought I don't wanna think about what will happen if he*  
159 *gets this!"* (ID 06, child with severe asthma  parents' fears were typically intensified  
160 by extreme worries that the virus might have a greater impact on their chronically ill  
161 child, relative to children without chronic illness. *"I've watched her crash and go to*  
162 *ICU. You know what a virus can do"* (ID 10, child with epilepsy). Parents of  
163 chronically ill children often reported taking precautions and self-restricting  
164 movement beyond what the Australian public health guidelines recommended and  
165 continued to do so during periods when there were no, or very few (<10), community  
166 cases in the state. *"I didn't go to the shops until Monday [December]. I hadn't been*  
167 *out like from February"*  (ID 09, child with end stage kidney failure).  
168  
169 Parents' fears centered on what might happen to their child if they became ill and  
170 could not support the daily medical needs of their child (see Table 2 for extended  
171 quotes). Parents worried that should a member of the family contract COVID-19,  
172 their child's chronic illness-related treatment would be postponed until the family  
173 completed their mandatory home-isolation period. *"That was my major anxiety last*  
174 *year, that one of us would get COVID and that would jeopardise his treatment. So*  
175 *that was my biggest concern"*  (ID 02, child with rhabdomyosarcoma). Families also  
176 reported fears that medical supplies might be disrupted during the pandemic.  
177 *"Because we rely on so many things to keep our little girl alive, I was definitely*  
178 *scared that things like that would be impacted."* (ID 09, child with end stage kidney  
179 failure) and in 2021, when the Delta strain caused case numbers to surge, parents  
180 were fearful that there would not be sufficient hospital beds available for their  
181 chronically ill child. *"I'm concerned if they [can] proceed with surgery that the beds*

182 *will all be filled with anti-vaxxers and cases of COVID.*” (ID 13, child with epilepsy  
183 (cortical dysplasia))

184

185 In terms of the emerging COVID-19 vaccines, some parents were concerned that  
186 there may be insufficient trialing of the vaccine in children with rare diseases, with  
187 potentially unknown risks. n also worried about vaccination because [my  
188 daughter] has a chronic illness. Like, is it going to be tested enough on people like  
189 that?” (ID 09, child with end stage kidney failure).

190

### 191 ***COVID-19 interruptions to medical care***

192 Despite many challenges and disruptions, many families reported that their child’s  
193 acute care continued uninterrupted, and that telehealth had supported ongoing virtual  
194 clinics and communication between families of children with chronic illness and  
195 hospital clinicians. Many families felt that communication with their team had not  
196 been disrupted. *“The hospital team’s been really supportive through it all. Always*  
197 *really impressed - we’ve been able to get onto them and everyone’s been really*  
198 *informative.*” (ID 10, child with epilepsy)

199

200 In terms of the ongoing management of chronic illnesses, some parents reported that  
201 clinics had been cancelled.  *I think they cancelled all eye clinic reviews for us for*  
202 *nearly a year.*” (ID 10, child with epilepsy). In addition, certain medications had not  
203 been available at the hospital pharmacy. *“I get a phone call from pharmacy and she*  
204 *goes, “Look, you can’t take all the medication because you know, with COVID, we*  
205 *have a shortage.”* (ID 12, child with Dextrocardia situs inversus). There were also  
206 considerable delays reported regarding critical scans and surgeries. *“He actually*

207 *needed surgery again but because of COVID ...it was delayed for a long time. He was*  
208 *getting quite unwell and we just had to wait.”* (ID 08, child with mid-aortic  
209 syndrome)

210

211 Some families were burdened with the difficult decision of deciding whether or not to  
212 proceed with surgery, weighing the potential risks (exposure to COVID-19 within the  
213 hospital) and benefits (of surgery) for their child. Delays to surgery were often  
214 beyond the control of families and caused significant anxiety among parents, as they  
215 watched their child’s health deteriorate. In addition, surgical delays often resulted in  
216 other developmental losses for young children, *“Huge worries about the future. [For]*  
217 *a 5 year old, a 6 months’ delay [to surgery] is a huge portion of their life and it’s*  
218 *such formative years in terms of their developmental opportunities.”* (ID 13, child  
219 with epilepsy (cortical dysplasia)). For some children, accessing potentially life-  
220 altering surgery at centers of excellence remained uncertain due to the closure of state  
221 borders.

222

223 Clinicians used videoconferencing platforms to conduct virtual clinics, which were  
224 perceived as easy to use and highly convenient *“There are times [my daughter] might*  
225 *just not be feeling great, or we are worried because i*  *inter ...so we just do*  
226 *telehealth.”* (ID 09, child with end stage kidney failure). The convenience of virtual  
227 clinics also included reducing travel burden, eliminating travel sickness, and fitting  
228 around other family commitments, for example, the schedules of a newborn baby.  
229 *“It’s nice not having to drive from Canberra to Sydney [3-hour drive], as I had a little*  
230 *baby.”* (ID 09, child with end stage kidney failure). Telehealth was seen as a tool that  
231 would also greatly benefit rural and regional families *“I think for regionally based*



232 *people telehealth is great.*” (ID 07, child with posterior urethral valves) and enhance  
233 interstate collaborations. Telehealth also supported the continuation of allied health  
234 services throughout the pandemic and families reported that this was convenient in  
235 many ways. *“The use of technology was forced upon everyone pretty quickly, but it*  
236 *certainly has its benefits.*” (ID 07, child with posterior urethral valves).

237

238 Families of children with chronic illness reported that their general practitioner’s (GP)  
239 use of telehealth was telephone-based (video-conferencing was not available) and that  
240 this this was the preferred method for low-risk, or ongoing management, for example,  
241 *“If it's something little that can be done over the phone, like a script or something”*  
242 (ID 03, child with nephrotic syndrome). Avoiding the contagion risks associated with  
243 the GP waiting room was also noted as a benefit of care provided via telehealth. *“I*  
244 *prefer not to take myself to a GP and risk catching something that I could give to [my*  
245 *chronically ill son] if I don't have to. So [I prefer] not taking my daughter there, or*  
246 *myself.*” (ID 04, child with acute lymphoblastic leukemia). Also, for families whose  
247 child was wheelchair bound, or who were less mobile due to their child’s chronic  
248 illness, telehealth with the GP was preferred. *“So it's made it so much easier, its*  
249 *brilliant actually*  *made life 100% better.*” (ID 01, child with cerebral palsy)

250

251 Given the convenience of telehealth, many families hoped that it would remain  
252 available as an option after the pandemic was over and cited advances in providing  
253 care remotely as a silver lining of the pandemic. The increased availability of and  
254 access to care that telehealth offers rural and remote families was also discussed. *“If*  
255 *we lived in a regional area [telehealth] would make a huge difference to accessing*  
256 *treatment.*” (ID 13, child with epilepsy (cortical dysplasia)) 

257

258 ***The impact of COVID-19 interruptions on mental health***

259 Some families reported that they had been coping well during the pandemic.

260 Protective factors included higher resilience among families with a chronically ill  
261 child relative to other families learning about self-care during earlier waves of the  
262 pandemic and utilizing virtual support groups. *“I think there is a certain amount of*  
263 *resilience and adaptability that you have when you’ve got a child with a chronic*  
264 *illness.”* (ID 06, child with severe asthma). Many families reported that the ways in  
265 which the pandemic had forced them to slow down, limit extracurricular activities,  
266 and spend more time together as a family, had been beneficial. *“We were happy with*  
267 *just the four of us and our little family for a while.”* (ID 03, child with nephrotic  
268 syndrome)

269

270 Parents recognized how important their own mental health was during this difficult  
271 time, as they needed to stay strong for their sick child. *“I’ve got an added*  
272 *responsibility to manage my feelings... I don’t want to impact his situation [and make*  
273 *it] more difficult because I’m not managing how I feel.”* (ID 13, child with epilepsy  
274 (cortical dysplasia)). Parents noted that they were having to manage their own mental  
275 health needs as they journeyed through their child’s illness path, *“The main thing that*  
276 *I’ve struggled with is sitting with the current uncertainty and trying to hold hope but*  
277 *also prepare myself for the possibility that it’s not treatable. I feel more despair and*  
278 *more hopelessness. Looking after [my son] I guess I’ve got an added responsibility to*  
279 *manage my feelings. I don’t want to impact his situation and make it more difficult*  
280 *because I’m not managing how I feel.”* (ID 13, child with epilepsy), as well as the  
281 needs of their chronically ill child *“It’s a bit of a rollercoaster ride with her, still*

282 *she's just sad.*" (ID 10, child with epilepsy), and siblings' mental health too, "*he's*  
283 *ended up with a bit of ongoing anxiety since lockdown; which we are still dealing*  
284 *with now.*" (ID 06, child with severe asthma).

285

286 Mothers recognized how much strain they had experienced to support others in the  
287 family, especially under circumstances that saw them also juggling multiple practical  
288 roles. Many mothers reported limited support for themselves, including not being able  
289 to see, or physically touch their friends during the most difficult times. "*When you're*  
290 *upset or something terrible happens you would hug your friends. ...I stopped that*  
291 *altogether.*" (ID 11, child with acute lymphoblastic leukemia). Some mothers  
292 reported that it had been difficult to lose their supportive work environment during  
293 this time and missed the reprieve that their career experiences gave them in a face-to-  
294 face work environment.

295

296 While some parents reported that they were aware that excellent support for their  
297 child was available via their child's hospital psychologist and social worker, "*I've*  
298 *spoken to [the clinical psychologist] a few times and she's amazing.*" (ID 05, child  
299 with pre B acute lymphoblastic leukemia), others reported that there were barriers to  
300 receiving mental health support during the pandemic, especially in the community  
301 setting. The pandemic had increased the need for services, at a time when services  
302 were limited, causing a backlog in private mental health services and long waitlists.

303

304 Many families were separated by pandemic-restrictions and the negative impact of  
305 this was consistently reported. To limit COVID-19 transmission risk, the hospital  
306 implemented a 'one-parent, no siblings' rule for most months from March, 2020

307 onwards. While parents understood the hospital's policy was aimed at protecting its  
308 patients and staff, they also felt this policy placed families at risk of mental health  
309 impacts as it limited the emotional support they could provide each other at critical  
310 times. Parents emphasized the importance of communicating well with each-other,  
311 especially during traumatic periods. Parents reported difficulty communicating their  
312 own emotional needs, as well as distressing and complex medical information to the  
313 second parent who was not allowed to enter the hospital.

314

315 Although parents were appreciative of the circumstance, they consistently emphasized  
316 the negative impact of siblings being unable to see each-other during hospital  
317 admissions. *"I'd say that probably had the biggest impact on the family."* (ID 11,  
318 child with acute lymphoblastic leukemia). Mothers of young siblings (e.g. breast-  
319 feeding infants) also found the experience to be distressing. *"I'm breastfeeding and  
320 I'm always the one that stays with [my chronically ill daughter]; that actually stressed  
321 me out probably nearly more than anything."* (ID 09, child with end stage kidney  
322 failure). Though a sibling exemption for breast-feeding infants was granted, allowing  
323 infants to accompany the mother in the hospital, infants were not allowed in the  
324 intensive care unit, causing additional stress and costs. Managing outpatient  
325 appointments was similarly reported as challenging for families with young children,  
326 from both a practical and financial perspective.

327

### 328 ***The impact of COVID-19 on support for families of children with chronic illness***

329 Families of children with a chronic illness reported that they typically sought support  
330 from extended family, however risks and restrictions during the pandemic meant that  
331 this was often not possible. Community organizations were also reported as a vital

332 support network for families. Unfortunately, many were limited in their capacity  
333 during the pandemic. The loss of charity funded accommodation, as well as social and  
334 psychological support, was keenly felt. Social support was reported as integral to  
335 well-being, with parents discussing how their local community, comprised of families  
336 of children without a chronic illness, suddenly became more understanding of what it  
337 was like to live with ongoing uncertainty and fear for their child's health. However,  
338 the valuable social support shared between families of children with a similar illness  
339 on the hospital wards was interrupted as many families tried to maintain social  
340 distancing and kitchens/communal areas were closed.

341

#### 342 ***COVID-19 interruptions to education***

343 Home-based-learning was seen as highly challenging during periods of school  
344 closures. "I was literally  ready to go 'See you all later, I am never coming back'. It  
345 was that bad." (ID 12, child with Dextrocardia situs inversus). Families of children  
346 with a chronic illness also raised unique issues, such as worries that if they ceased  
347 home schooling and returned their child to school, the spread of COVID-19 through  
348 their child's school might delay their child's treatment or surgery. Some parents  
349 shared that they also kept siblings home even after schools were re-opened,  
350 potentially compromising their learning outcomes, due to fears that "catching  
351 something" would compromise the treatment protocols of their ill child.

352

353 Parents expressed that they felt the COVID-safe arrangements at the school, including  
354 not allowing parents on campus, meant that they were less able to communicate with  
355 teachers, resulting in missed feedback regarding their child's educational needs, and  
356 medical symptoms. Parents shared that they felt guilty and reluctant to send their

357 child with additional needs to school during “closures”, as schools had limited staff  
358 on campus.

359

360 Though parents often waited additional weeks before allowing their child to return to  
361 school after periods of closure, once most children had returned to school, the school  
362 stopped supporting home-based-learning leading to some parents feeling that their  
363 child was disadvantaged. However, other parents noted that the pandemic had actually  
364 helped their child who would not have been able to attend school due to illness, by  
365 increasing the availability of online learning platforms and resources. Some parents of  
366 chronically ill children also reported that they felt like they were better equipped to  
367 manage distance education than families of healthy children, due to past experiences.

368

369 Parents shared that they appreciated that schools and students were maintaining better  
370 cleaning and hygiene practices, and that children who were unwell or displaying any  
371 symptoms were discouraged from attending school. Parents noted that given these  
372 measures of prevention, their child had experienced fewer infections over the past  
373 several months with a notable positive impact on their health.

374

375

## **Discussion**

376

377 Despite experiencing lower levels of COVID-19 than many other parts of the world,  
378 especially during 2020, disruptions to health, education and social support have had  
379 an acute psychosocial impact on Australian families of children with chronic illness.  
380 Adequately responding to and addressing the unique needs of these vulnerable  
381 families, as well as planning for the minimization of longer-term impacts is critical.

382

383 As hospitals rapidly reorganized in response to the developing pandemic, many  
384 clinics were temporarily closed and clinicians were challenged to find alternative  
385 ways to continue to provide treatment and care while maintaining social distancing  
386 practices. For most, embracing telehealth was the obvious solution and the rapid  
387 uptake of virtual care was supported by new videoconferencing platforms that patients  
388 and their families found easy to access and use (20). Positive attitudes towards  
389 pediatric telehealth (21, 22) are supported by our current study findings, with  
390 telehealth perceived to be convenient and one of the pandemic's "silver linings",  
391 which families hoped would remain after COVID-19 had abated. New models of care  
392 that integrate telehealth need to be developed, superseding the current model of  
393 repeatedly delivering stand-alone instances of use (i.e. the stop-gap use model) (23,  
394 24). Comprehensive models that offer a number of services, increase in complexity as  
395 needed, and address needs from diagnosis to disease progression and long term care  
396 are required. Such programs are beginning to emerge, including Contactless (25),  
397 which specifically addresses the care needs of pediatric patients with rare and chronic  
398 conditions, who typically need regular follow-up even in the absence of acute events.

399

400 While telehealth has the potential to offer convenient care, improve access for rural  
401 families, and increase equity by decreasing the s associated with accessing care  
402 for patients, more comprehensive evidence is needed to demonstrate that the  
403 telehealth model of care is at least equivalent to face to face care in terms of health  
404 outcomes. Also, telehealth may not be appropriate for families closer to diagnosis,  
405 whose child's management is still new, difficult, unfamiliar or fluctuating, and for  
406 families who are yet to establish a good working relationship with their clinical team.

407 Special consideration of these newer families' needs should be taken into account  
408 when designing care pathways that incorporate or rely on telehealth.

409

410 Sydney Children's Hospital Network has reported a 55% increase in pediatric mental  
411 health presentations during the COVID-19 period (26). The findings of this study  
412 confirm that there is a significant unmet need for psychosocial support among  
413 families of children with chronic illness. While this need most likely predated the  
414 pandemic, it is likely to have become stronger as stressors compound, services are  
415 stretched, and waitlists lengthen. This need for psychosocial support is reiterated in  
416 the emerging literature (1, 27-30) and new scales, such as the 'COVID-19 Family  
417 Stressor Scale' have been developed to measure COVID-related disruption and  
418 psychological stress (31). It is important to remember, as many countries re-establish  
419 unrestricted movement and confidence, that many families of children with chronic  
420 illness will continue to prioritize their child's health over their family's need to return  
421 to normal. Among a community already fatigued by multiple lockdowns and  
422 pandemic stress, these families may experience an extended period of stress, fear,  
423 restrictions and diminished social interaction. It is critical to acknowledge that  
424 families of children with chronic illness may have a disproportionately difficult  
425 experience relative to other groups. Ensuring that appropriate psychosocial support  
426 services are available to families of children with chronic illness is a critical part of  
427 our community's roadmap out of the COVID-19 pandemic.

428

429 Families of children with chronic illness reported hospital visitation restrictions as one  
430 of the most challenging aspects of the pandemic, both practically and emotionally.

431 During the pandemic, pediatric wards have been challenged with unique



432 considerations in regards to visitation policies. While early evidence indicates visitor  
433 restriction is effective in preventing transmission of viruses within hospital settings  
434 (32), there are substantial complexities to be considered on pediatric wards. These  
435 include the dependence of young children on their parents for nutrition (e.g. breast  
436 feeding newborns), accomplishing daily-living tasks (e.g. dressing), decision-making  
437 (including medico-legal decisions), patient and parent education, and emotional  
438 comfort during traumatic illness and procedures.

439

440 Internationally, approximately 94% of North American hospitals with a pediatric  
441 ward, changed their visitor screening policy due to COVID-19 (33). Though limiting  
442 visitors to children's hospitals is consistent internationally, we call on researchers and  
443 clinicians to re-imagine infection control within a family-centered model of care (34)  
444 that will limit parent reported increases in stress, feelings of emotional isolation and  
445 decreased support, decreased medical communication, marital discord, sibling  
446 distress, financial stress, chronic sleep deprivation and career interruption. Additional  
447 psychosocial support to families on the wards should be provided until revised models  
448 of COVID-safe, family-centered care can be implemented.

449

#### 450 ***Limitations***

451 Our findings are based on the experiences of mothers only, with no fathers choosing  
452 to participate. Wade et. al. have shown that mothers have generally experienced  
453 greater COVID stress/disruption, distress, anxiety, and post-traumatic stress  
454 symptoms, compared to fathers. In the Wade et. al. study mothers' higher COVID  
455 stress/disruption independently predicted all mental health outcomes, suggesting a  
456 stress accumulation model (35). This is consistent with our finding that mothers

457 reported one of the most difficult aspects of the pandemic was the “juggling act” that  
458 they had to perform. It is also possible that hospitals’ one-parent rule acts as a  
459 protective factor among fathers who, in this way, are shielded from distressing scenes  
460 of their child being ill, difficult conversations with medical professionals, and are not  
461 burdened by multiple responsibilities. Further research is needed to explore the  
462 experiences of fathers specifically.

463

464 This study is also limited to English speaking participants, recruited from a single site,  
465 and the recruitment of a small sample. Though the sample size of this study is small,  
466 sample adequacy in qualitative investigation relates to the appropriateness of the  
467 sample composition and size (36). By purposively selecting families across a range of  
468 different diseases, ages, times since diagnosis, distances from the hospital and  
469 personal circumstances, the composition of this sample provides richly-textured and  
470 wide-ranging information relevant to the COVID-19 experience. Recent research has  
471 shown greater efficiency of purposive sampling (and accordingly lower sample size  
472 needs) compared to random sampling, as used in qualitative studies (37).  
473 Furthermore, data saturation was observed within this sample, with no new themes  
474 reported within the last two interviews.

475

## 476 ***Conclusions***

477 The pandemic has, and will likely continue to go through waves, as new variants  
478 develop. It is critical that we understand the challenges and needs of families with  
479 chronically ill children and prepare a health and education system that will meet these  
480 needs in the future. Key lessons learned during the COVID-19 era can also inform

481 innovations that generalize beyond the pandemic, including the benefits of advanced  
482 telehealth for rural and unwell families, the importance of psychosocial and family-  
483 centered care.

484

485 **Acknowledgements:**

486 The authors acknowledge the support of the Maridulu Budyari Gumal, The Sydney  
487 Partnership for Health, Education, Research & Enterprise (SPHERE) Child Unlimited  
488 Clinical Academic Group; CEW is supported by the National Health and Medical  
489 Research Council of Australia (APP2008300).

490

491

## References

- 492 1. Moreira DC, Millen GC, Sands S, Kearns PR, Hawkins DS. The Care of  
493 Children With Cancer During the COVID-19 Pandemic. *American Society of Clinical  
494 Oncology Educational Book*. 2021(41):e305-e14.
- 495 2. Tse Y, Darlington A-SE, Tyerman K, Wallace D, Pankhurst T, Chantziara S,  
496 et al. COVID-19: experiences of lockdown and support needs in children and young  
497 adults with kidney conditions. *Pediatric Nephrology*. 2021;36(9):2797-810.
- 498 3. Reilly C, Muggeridge A, Cross JH. The perceived impact of COVID-19 and  
499 associated restrictions on young people with epilepsy in the UK: Young people and  
500 caregiver survey. *Seizure*. 2021;85:111-4.
- 501 4. Boechat JL, Wandalsen GF, Kuschnir FC, Delgado L. COVID-19 and  
502 pediatric asthma: clinical and management challenges. *International journal of  
503 environmental research and public health*. 2021;18(3):1093.
- 504 5. Azevedo JP, Hasan A, Goldemberg D, Geven K, Iqbal SA. Simulating the  
505 potential impacts of COVID-19 school closures on schooling and learning outcomes:  
506 A set of global estimates. *The World Bank Research Observer*. 2021;36(1):1-40.
- 507 6. Engzell P, Frey A, Verhagen MD. Learning loss due to school closures during  
508 the COVID-19 pandemic. *Proceedings of the National Academy of Sciences*.  
509 2021;118(17).
- 510 7. Fontenelle-Tereshchuk D. Mental health and the COVID-19 crisis: The hopes  
511 and concerns for children as schools re-open. *Interchange*. 2021;52(1):1-16.
- 512 8. Ye J. Pediatric mental and behavioral health in the period of quarantine and  
513 social distancing with COVID-19. *JMIR pediatrics and parenting*. 2020;3(2):e19867.

- 514 9. Mattson G, Kuo DZ, Yogman M, Baum R, Gambon TB, Lavin A, et al.  
515 Psychosocial factors in children and youth with special health care needs and their  
516 families. *Pediatrics*. 2019;143(1).
- 517 10. Serlachius A, Badawy SM, Thabrew H. Psychosocial challenges and  
518 opportunities for youth with chronic health conditions during the COVID-19  
519 pandemic. *JMIR Pediatrics and Parenting*. 2020;3(2):e23057.
- 520 11. Edge R, Meyers J, Tiernan G, Li Z, Schiavuzzi A, Chan P, et al. Cancer care  
521 disruption and reorganisation during the COVID-19 pandemic in Australia: A patient,  
522 carer and healthcare worker perspective. *PLOS ONE*. 2021;16(9):e0257420.
- 523 12. Garfan S, Alamoodi AH, Zaidan BB, Al-Zobbi M, Hamid RA, Alwan JK, et  
524 al. Telehealth utilization during the Covid-19 pandemic: A systematic review.  
525 *Computers in Biology and Medicine*. 2021;138:104878.
- 526 13. Kostopoulou E, Sinopidis X, Gidaris D, Karantaglis N, Kassimos D, Gkentzi  
527 D, et al. Parents under siege: the psychological impact of COVID-19 outbreak on  
528 children's caregivers. *Swiss Medical Weekly*. 2021(31).
- 529 14. Wimberly CE, Towry L, Caudill C, Johnston EE, Walsh KM. Impacts of  
530 COVID-19 on caregivers of childhood cancer survivors. *Pediatric Blood & Cancer*.  
531 2021;68(4):e28943.
- 532 15. Craig P, Dieppe P, Macintyre S, Michie S, Nazareth I, Petticrew M.  
533 Developing and evaluating complex interventions: the new Medical Research Council  
534 guidance. *BMJ*. 2008;337:a1655.
- 535 16. Australian Government DoH. Coronavirus (COVID-19) at a glance for 30  
536 June 2021. [https://www.health.gov.au/resources/publications/coronavirus-covid-19-at-](https://www.health.gov.au/resources/publications/coronavirus-covid-19-at-a-glance-30-june-2021)  
537 [a-glance-30-june-2021](https://www.health.gov.au/resources/publications/coronavirus-covid-19-at-a-glance-30-june-2021). 2021.

- 538 17. Clarke V, Braun V. Thematic analysis. *Encyclopedia of critical psychology*:  
539 Springer; 2014. p. 1947-52.
- 540 18. QSR International Pty Ltd. (2020) NVivo (released in March 2020),  
541 <https://www.qsrinternational.com/nvivo-qualitative-data-analysis-software/home>.
- 542 19. Tong A, Sainsbury P, Craig J. Consolidated criteria for reporting qualitative  
543 research (COREQ): a 32-item checklist for interviews and focus groups. *International*  
544 *journal for quality in health care*. 2007;19(6):349-57.
- 545 20. Kenney LB, Vrooman LM, Lind ED, Brace-O'Neill J, Mulder JE, Nekhlyudov  
546 L, et al. Virtual visits as long-term follow-up care for childhood cancer survivors:  
547 Patient and provider satisfaction during the COVID-19 pandemic. *Pediatric Blood &*  
548 *Cancer*. 2021;68(6):e28927.
- 549 21. Rametta SC, Fridinger SE, Gonzalez AK, Xian J, Galer PD, Kaufman M, et al.  
550 Analyzing 2,589 child neurology telehealth encounters necessitated by the COVID-19  
551 pandemic. *Neurology*. 2020;95(9):e1257-e66.
- 552 22. Dahl-Popolizio S, Carpenter H, Coronado M, Popolizio NJ, Swanson C.  
553 Telehealth for the Provision of Occupational Therapy: Reflections on Experiences  
554 During the COVID-19 Pandemic. *Int J Telerehabil*. 2020;12(2):77-92.
- 555 23. Camden C, Silva M. Pediatric Telehealth: Opportunities Created by the  
556 COVID-19 and Suggestions to Sustain Its Use to Support Families of Children with  
557 Disabilities. *Physical & Occupational Therapy In Pediatrics*. 2021;41(1):1-17.
- 558 24. Menon DU, Belcher HME. COVID-19 Pandemic Health Disparities and  
559 Pediatric Health Care—The Promise of Telehealth. *JAMA Pediatrics*.  
560 2021;175(4):345-6.

- 561 25. Mercuri E, Zampino G, Morsella A, Pane M, Onesimo R, Angioletti C, et al.  
562 Contactless: a new personalised telehealth model in chronic pediatric diseases and  
563 disability during the COVID-19 era. *Italian Journal of Pediatrics*. 2021;47(1):29.
- 564 26. Hu N, Nassar N, Shrapnel J, Perkes I, Hodgins M, O'Leary F, et al. The  
565 impact of the COVID-19 pandemic on paediatric health service use within one year  
566 after the first pandemic outbreak in New South Wales Australia—a time series  
567 analysis. *The Lancet Regional Health-Western Pacific*. 2022;19:100311.
- 568 27. Durcan G, Barut K, Haslak F, Doktor H, Yildiz M, Adrovic A, et al.  
569 Psychosocial and clinical effects of the COVID-19 pandemic in patients with  
570 childhood rheumatic diseases and their parents. *Rheumatology International*.  
571 2021;41(3):575-83.
- 572 28. Correale C, Tondo I, Falamesca C, Capitello TG, Vigevano F, Specchio N, et  
573 al. Depression and anxiety in hospitalized children with epilepsy during COVID-19  
574 pandemic: Preliminary findings of a cross-sectional study. *European Psychiatry*.  
575 2021;64(S1):S670-S1.
- 576 29. Farajzadeh A, Dehghanizadeh M, Maroufizadeh S, Amini M, Shamili A.  
577 Predictors of mental health among parents of children with cerebral palsy during the  
578 COVID-19 pandemic in Iran: A web-based cross-sectional study. *Research in*  
579 *Developmental Disabilities*. 2021;112:103890.
- 580 30. Havermans T, Houben J, Vermeulen F, Boon M, Proesmans M, Lorent N, et  
581 al. The impact of the COVID-19 pandemic on the emotional well-being and home  
582 treatment of Belgian patients with cystic fibrosis, including transplanted patients and  
583 paediatric patients. *Journal of Cystic Fibrosis*. 2020;19(6):880-7.

- 584 31. Prime H, Wade M, May SS, Jenkins JM, Browne DT. The COVID-19 Family  
585 Stressor Scale: validation and measurement invariance in female and male caregivers.  
586 *Frontiers in Psychiatry*. 2021;12.
- 587 32. Washam M, Woltmann J, Ankrum A, Connelly B. Association of visitation  
588 policy and health care-acquired respiratory viral infections in hospitalized children.  
589 *American journal of infection control*. 2018;46(3):353-5.
- 590 33. Kitano T, Piché-Renaud P-P, Groves HE, Streitenberger L, Freeman R,  
591 Science M. Visitor Restriction Policy on Pediatric Wards During Novel Coronavirus  
592 (COVID-19) Outbreak: A Survey Study Across North America. *Journal of the*  
593 *Pediatric Infectious Diseases Society*. 2020;9(6):766-8.
- 594 34. Goga A, Feucht U, Pillay S, Reubenson G, Jeena P, Madhi S, et al. Parental  
595 access to hospitalised children during infectious disease pandemics such as COVID-  
596 19. *South African Medical Journal*. 2021;111(2):100-5.
- 597 35. Wade M, Prime H, Johnson D, May SS, Jenkins JM, Browne DT. The  
598 disparate impact of COVID-19 on the mental health of female and male caregivers.  
599 *Social Science & Medicine*. 2021;275:113801.
- 600 36. Vasileiou K, Barnett J, Thorpe S, Young T. Characterising and justifying  
601 sample size sufficiency in interview-based studies: systematic analysis of qualitative  
602 health research over a 15-year period. *BMC medical research methodology*.  
603 2018;18(1):1-18.
- 604 37. van Rijnsoever FJ. (I Can't Get No) Saturation: A simulation and guidelines  
605 for sample sizes in qualitative research. *PloS one*. 2017;12(7):e0181689.
- 606
- 607



609 Table 1: Participant demographic characteristics

| Participant characteristic                                     | N=13                                                                                                                                                                                                                                                                                                                                                                                                                                                                                                                     |
|----------------------------------------------------------------|--------------------------------------------------------------------------------------------------------------------------------------------------------------------------------------------------------------------------------------------------------------------------------------------------------------------------------------------------------------------------------------------------------------------------------------------------------------------------------------------------------------------------|
| Parent sex, n(%)                                               | 13 female (100%)                                                                                                                                                                                                                                                                                                                                                                                                                                                                                                         |
| Parent age, mean (range)                                       | 42.3 years (range: 36-52 years)                                                                                                                                                                                                                                                                                                                                                                                                                                                                                          |
| Sex of child with chronic illness, n(%)                        | 61.5% male                                                                                                                                                                                                                                                                                                                                                                                                                                                                                                               |
| Age of child with chronic illness, mean (range)                | 8.5 years (range: 4-16 years)                                                                                                                                                                                                                                                                                                                                                                                                                                                                                            |
| Number of siblings of child with chronic illness, mean (range) | 1.8 siblings (range: 1-7)                                                                                                                                                                                                                                                                                                                                                                                                                                                                                                |
| Sibling age, mean (range)                                      | 12.5 years (range: 0-24 years)                                                                                                                                                                                                                                                                                                                                                                                                                                                                                           |
| Chronic illness diagnosis*                                     | <p>Cancer</p> <ul style="list-style-type: none"> <li>Pre B Acute Lymphoblastic Leukemia</li> <li>Acute Lymphoblastic Leukemia</li> <li>Acute Lymphoblastic Leukemia</li> <li>Rhabdomyosarcoma</li> </ul> <p>Renal</p> <ul style="list-style-type: none"> <li>Nephrotic syndrome</li> <li>Posterior urethral valves</li> <li>End stage kidney failure</li> <li>Mid-aortic syndrome</li> </ul> <p>Neurology</p> <ul style="list-style-type: none"> <li>Epilepsy</li> <li>Epilepsy (neuronal migration disorder)</li> </ul> |

|  |                                                                                                                            |
|--|----------------------------------------------------------------------------------------------------------------------------|
|  | Epilepsy (cortical dysplasia)<br>Other<br>Cerebral Palsy<br>Severe asthma<br>Bronchiectesis<br>Dextrocardia situs inversus |
|--|----------------------------------------------------------------------------------------------------------------------------|

610

611 \* Some children were diagnosed with multiple chronic illnesses and as such, more  
612 than 13 illnesses are reported.

613

614

Table 2 The perceived impact of COVID-19 - illustrative quotations of longer length.

| COVID-19 specific concerns                                           |                                                                                                                                                                                                                                                                                                                                                                                                                                                                          |
|----------------------------------------------------------------------|--------------------------------------------------------------------------------------------------------------------------------------------------------------------------------------------------------------------------------------------------------------------------------------------------------------------------------------------------------------------------------------------------------------------------------------------------------------------------|
| Summary                                                              | Quote                                                                                                                                                                                                                                                                                                                                                                                                                                                                    |
| The severe impact of viruses on a chronically ill children           | “Even as news came in that kids don’t seem to get sick with it so much, there was enough data online that said most kids don’t, but some kids do... So that was a really nerve wrecking experience.” (ID 06, child with severe asthma)                                                                                                                                                                                                                                   |
| Prolonged isolation                                                  | We're more aware of where we're going and how we're acting in the community. We are very conscious and we've been masking for a long time. We've still got the hand sanitiser everywhere and we are still being cautious.” (ID 10, child with epilepsy)                                                                                                                                                                                                                  |
| The impact of parents' developing COVID-19 on the child's care needs | “I am very, very worried about if [my husband] and I got it - what would happen to [my daughter]. We do all of [her] care - her 11 hours of dialysis every night, we have to count every milliliter she's drinking, we have to double boil her puree, we have to weigh all her food, extreme okay and I am extremely scared about what would happen, if [my husband] and I went down - what would happen to [my daughter]?” (ID 09, child with end stage kidney failure) |
|                                                                      | You know as a parent ...they need you. Like it doesn't work if we don't have parents to keep this going forward. that risk, even if she'd be fine if she got it, if one of us got it, it would be disastrous.” (ID 10, child with epilepsy)                                                                                                                                                                                                                              |

|                                                    |                                                                                                                                                                                                                                                                                                                                                                                                                                                                                                                           |
|----------------------------------------------------|---------------------------------------------------------------------------------------------------------------------------------------------------------------------------------------------------------------------------------------------------------------------------------------------------------------------------------------------------------------------------------------------------------------------------------------------------------------------------------------------------------------------------|
| Chronically ill children advocated for the vaccine | “I think she was the most excited I’ve ever seen a child about anything when we got our vaccination appointment. She was really excited because in her mind that was a big thing to sort of mark ...that it will be over.” (ID 10, child with epilepsy)                                                                                                                                                                                                                                                                   |
| COVID-19 interruptions to medical care             |                                                                                                                                                                                                                                                                                                                                                                                                                                                                                                                           |
| Summary                                            | Quote                                                                                                                                                                                                                                                                                                                                                                                                                                                                                                                     |
| Cancellation of clinics                            | “His last two operations they thought he had an anaphylactic reaction. So [he had an] allergy clinic [in] March, so they cancelled it then they made a new one, they cancelled it again... Then he had to have surgery in the beginning of August ...and they wanted to do all the [allergy] testing before that, but they decided not to because of COVID. But then he had the reaction again! So then they decided, “Oh actually, you do need to come to [the allergy] clinic!” (ID 08, child with mid-aortic syndrome) |
| Delays for critical scans and surgeries            | “They said that there was a big delay on being able to provide that [SPECT scan] because the radioactive substance that’s injected in the kids, there was a shortage of that in Australia because of COVID.” (ID 13, child with epilepsy (cortical dysplasia))                                                                                                                                                                                                                                                            |
|                                                    | “[the surgeon said] ‘What do you want to do? We could probably squeeze her in before elective surgeries and all those things are closed and cancelled [end of March]. But obviously we’ve got the worry of COVID. What do you want to do?’ And I’m like I don’t know? It’s a very hard decision                                                                                                                                                                                                                           |

|                                                                          |                                                                                                                                                                                                                                                                                                                                                                           |
|--------------------------------------------------------------------------|---------------------------------------------------------------------------------------------------------------------------------------------------------------------------------------------------------------------------------------------------------------------------------------------------------------------------------------------------------------------------|
|                                                                          | to make. I really agonised over it and in the end ... it got postponed. ... The option [didn't become available again until] July. If this [surgery] had worked, [my daughter] would be getting a transplant." (ID 09, child with end stage kidney failure)                                                                                                               |
| Interstate border closures restricted surgeries at centers of excellence | "When we spoke to them about the possibility of having surgery interstate, the body language of the doctor was very defensive. Whereas I think if it wasn't for COVID we would be able to access that service much more easily." (ID 13, child with epilepsy (cortical dysplasia))                                                                                        |
| Telehealth was more convenient                                           | "We've had neurology, respiratory, bronchiectasis, pediatrics, all on telehealth. And it's been great. Yes. Really good. So much easier for me and for him because it really gets very draining going into the hospital for all of the appointments all of the time." (ID01, child with cerebral palsy)                                                                   |
| Telehealth supported interstate collaborations for complex cases         | "So all the appointments with the Melbourne doctors have been by telehealth, which has been great. So there's been a really nice collaboration between the Sydney doctors and the Melbourne doctors in terms of sharing of resources and that's definitely been amazing to have access to that service via telehealth." (ID 13, child with epilepsy (cortical dysplasia)) |
|                                                                          | "We were able to pivot her physio and do [it] by telehealth, which worked really well. Also, if we go to speech therapy we drive half an hour each direction, which means she [misses an] hour of school. If we can do the telehealth at 8                                                                                                                                |

|                                                       |                                                                                                                                                                                                                                                                                                                                                                                                                                                                |
|-------------------------------------------------------|----------------------------------------------------------------------------------------------------------------------------------------------------------------------------------------------------------------------------------------------------------------------------------------------------------------------------------------------------------------------------------------------------------------------------------------------------------------|
|                                                       | o'clock in the morning just before school, it fits in a lot better with the day.” (ID 10, child with epilepsy)                                                                                                                                                                                                                                                                                                                                                 |
| Support for GP telehealth use                         | “For me I think telehealth was another silver lining... I think that’s been really good and that should stay because for people in my situation, not having to be physically present all the time is a blessing, whether or not there's a pandemic.” (ID 04, child with acute lymphoblastic leukemia)                                                                                                                                                          |
| The impact of COVID-19 interruptions on mental health |                                                                                                                                                                                                                                                                                                                                                                                                                                                                |
| Summary                                               | Quote                                                                                                                                                                                                                                                                                                                                                                                                                                                          |
| Learning from experience                              | “This time around I’ve been able to manage [my mental health] a bit better because I’ve been able to put different things in place. I’ve actually taken more self care.” (ID 13, child with epilepsy (cortical dysplasia))                                                                                                                                                                                                                                     |
| Peer support                                          | “Some things sprung up like Redkite started doing online coffee groups and for a while I was joining that every week. That was actually quite good for me, quite therapeutic And also the Leukaemia Foundation did some similar kind of thing. So those were actually quite good for me in that lockdown, uncertain period  ID 04, child with acute lymphoblastic leukemia) |
| Increased family time                                 | “Probably one of the positive things was that things slowed down quite a bit, so we weren’t rushing to afterschool activities and there was time for us to go on family walks, family bike rides and all that sort of stuff. So that was                                                                                                                                                                                                                       |

|                                          |                                                                                                                                                                                                                                                                                                                                                                                                                                                                                                                                                                                                                                      |
|------------------------------------------|--------------------------------------------------------------------------------------------------------------------------------------------------------------------------------------------------------------------------------------------------------------------------------------------------------------------------------------------------------------------------------------------------------------------------------------------------------------------------------------------------------------------------------------------------------------------------------------------------------------------------------------|
|                                          | definitely a positive of [the pandemic].” (ID 07, child with posterior urethral valves)                                                                                                                                                                                                                                                                                                                                                                                                                                                                                                                                              |
|                                          | <p>“We are just a tight knit family, so we got on really well. ... We just adapted really well. At one stage [her brother] came up to me and was like, “This is really nice, she hasn’t been to the hospital for ages and we have all this time together”. So for them, they built this beautiful little relationship they'd not necessarily had the time together to develop because he's at school and she's just been out of the house. So... it  quite nice because we finally got to spend time as a family.” (ID 10, child with epilepsy)</p> |
| The multiple responsibilities of mothers | <p>“I guess the hardest thing has just been the juggling act. Just the challenge has been trying to do my job, keep the business running, run a family, and now without any kind of babysitters or cleaners or any extra help and without school and without childcare, so that’s been the trickiest part of COVID I think for me personally.” (ID 13, child with epilepsy (cortical dysplasia))</p>                                                                                                                                                                                                                                 |
|                                          | <p>“I think because like a lot of families the burden of childcare has largely or exclusively fallen on the mother I’d say. So I’d say that’s mostly me that is suffering as a result of that, either the extra workload or just the awareness that the general sort of structure that I prefer to have within our family and within our life there’s had to be lots of compromises in terms of just logistically being able to juggle the competing</p>                                                                                                                                                                             |

|                                            |                                                                                                                                                                                                                                                                                                                                                                                                                                               |
|--------------------------------------------|-----------------------------------------------------------------------------------------------------------------------------------------------------------------------------------------------------------------------------------------------------------------------------------------------------------------------------------------------------------------------------------------------------------------------------------------------|
|                                            | responsibilities.” (ID 13, child with epilepsy (cortical dysplasia))                                                                                                                                                                                                                                                                                                                                                                          |
| Distance from friends at challenging times | “[My daughter’s] initial [cancer] diagnosis was when we were really in the middle of the pandemic. When you're upset or something terrible happens you would hug your friends. ...I stopped that altogether. I had friends dropping things off to me at the hospital and they’re like I wanna give you a hug and I’m like we’re not. I don’t want you. I think personally that affected me.” (ID 11, child with acute lymphoblastic leukemia) |
| Loss of professional identity              | “When you get out of the house and you go to work, you're someone different, you're the person at work. But when you're kind of just stuck in this house with a pandemic, [your child’s illness] just becomes your identity and you're a cancer parent. The mental health impact of that was a lot greater than I recognized at the time.” (ID 04, child with acute lymphoblastic leukemia)                                                   |
| Psychosocial support was lacking           | “I so badly need to see a counsellor. I really needed to spend some time talking to somebody particularly at the beginning. Like at the beginning they didn’t even want the social workers to meet us in person and it’s just ridiculous. Support staff needs to be accessible, if social workers and psych and things are not around it can have a terrible impact at certain times.” (ID 05, child with pre B acute lymphoblastic leukemia) |



|                                                                                    |                                                                                                                                                                                                                                                                                                                                                                                                                                                                                                                                                                                                                                                   |
|------------------------------------------------------------------------------------|---------------------------------------------------------------------------------------------------------------------------------------------------------------------------------------------------------------------------------------------------------------------------------------------------------------------------------------------------------------------------------------------------------------------------------------------------------------------------------------------------------------------------------------------------------------------------------------------------------------------------------------------------|
| <p>Long waitlists for psychosocial support</p>                                     | <p>“We're finding now waitlists are a lot longer than normal for a lot of the [psychologists], just because they've got that backlog. It makes it a little trickier to access those services as a family. ...it just takes a lot of running around to try and find places with availability.” (ID 10, child with epilepsy)</p>                                                                                                                                                                                                                                                                                                                    |
| <p>Mental health impact of the ‘one parent, no siblings’ hospital restrictions</p> | <p>“Hospitals are doing what they need to do, but there's a real risk attached to it. There's a real risk and I know mental health is the problem of 2020 for everybody, but there really is such a risk attached.” (ID 05, child with pre B acute lymphoblastic leukemia)</p>                                                                                                                                                                                                                                                                                                                                                                    |
| <p>Separation of parents</p>                                                       | <p>“When my daughter was diagnosed [with cancer] they wouldn't let my husband come into the hospital. He had to go downstairs and stand next to a Coke machine and listen in on a call with six people discussing my daughter's diagnosis. And there was one afternoon she almost died - like the full-on warning. The professor was in the room like, "I'm concerned, you must prepare" and like my husband is sitting down in the car park. And he couldn't support me emotionally because he just didn't understand where I was at with it all because he just wasn't in the room.” (ID 05, child with pre B acute lymphoblastic leukemia)</p> |
|                                                                                    | <p>“One of the biggest things [for] people with long term illness is you've got to stay on-board with your partner. Like the strain on your home-life is a very close second to the illness itself. [I was] sitting there crying outside the hospital saying</p>                                                                                                                                                                                                                                                                                                                                                                                  |

|                               |                                                                                                                                                                                                                                                                                                                                                                                                                                                                                                                                                                         |
|-------------------------------|-------------------------------------------------------------------------------------------------------------------------------------------------------------------------------------------------------------------------------------------------------------------------------------------------------------------------------------------------------------------------------------------------------------------------------------------------------------------------------------------------------------------------------------------------------------------------|
|                               | <p>to my husband this is a really serious moment and things are not matching and they are telling us... the conversations are starting..., and he was just oblivious to it. My husband's a reasonable man, I mean we have a good marriage, good communication, and we've mainly done well through this, but I just thought holy s**t, like at that moment if we weren't educated people, if English wasn't our first language, if there was any disadvantage, I don't know what could've happened that day.” (ID 05, child with pre B acute lymphoblastic leukemia)</p> |
|                               | <p>“A lot of things get lost in translation ...and it actually builds frustration between us. There's a lot of complex information that goes back and forward on a day to day basis that doesn't always get communicated because he is not there.” (ID 11, child with acute lymphoblastic leukemia)</p>                                                                                                                                                                                                                                                                 |
| <p>Separation of siblings</p> | <p>“They love each other. So she would cry for him and he was very, very confused because of his age [4 years], and he needed to see her. When she did see him, either coming home briefly or through the doors at the hospital, her mental state was immediately better for two or three days. The boost was really noticeable and it really helped our son to settle, because ...he was just very confused and very upset. He was quite problematic.” (ID 05, child with pre B acute lymphoblastic leukemia)</p>                                                      |

|                                                      |                                                                                                                                                                                                                                                                                                                                                                                                                                                                                                                                                                                                                                                                                                                                                                                           |
|------------------------------------------------------|-------------------------------------------------------------------------------------------------------------------------------------------------------------------------------------------------------------------------------------------------------------------------------------------------------------------------------------------------------------------------------------------------------------------------------------------------------------------------------------------------------------------------------------------------------------------------------------------------------------------------------------------------------------------------------------------------------------------------------------------------------------------------------------------|
|                                                      | <p>“The kids are only 14 months apart so they are exceptionally close. [My daughter] is desperate for his companionship. She's just grown up with him that's all she's known. So for him not being able to come into the hospital, she has been incredibly distraught. I'd say that probably had the biggest impact on the family. Because I spend so much time in hospital, this past six months have been really traumatic for [my daughter], but the gravitating impact of that has been on his emotional well being. We'll have this connect-disconnect-connect-disconnect for him. So we've [had] unexpected behaviors from him we've put down to us not being together as a family and him being shuffled around quite a bit.” (ID 11, child with acute lymphoblastic leukemia)</p> |
|                                                      | <p>They're the best of friends. And that was the other thing I thought - how can we say this little girl can't see her baby sister while she's going through such a hell time in the hospital? And again, I understand, at the same time I know COVID is scary and they have to make sure everyone's safe, but you also got to think about people and family. And given [my daughter's] trauma like, [her sibling] just calmed her right down. (ID 09, child with end stage kidney failure)</p>                                                                                                                                                                                                                                                                                           |
| <p>Challenges caring for young siblings hospital</p> | <p>“My husband and I were allowed in ICU ...the baby [was] not allowed in ICU. We had to basically pay for my parents to stay in accommodation with us so they could help look after the baby. ...So that was a massive impact on us too.</p>                                                                                                                                                                                                                                                                                                                                                                                                                                                                                                                                             |

|                                                                                        |                                                                                                                                                                                                                                                                                                              |
|----------------------------------------------------------------------------------------|--------------------------------------------------------------------------------------------------------------------------------------------------------------------------------------------------------------------------------------------------------------------------------------------------------------|
|                                                                                        | And [the baby] wasn't easy - she'd scream and cry and scream and cry because she didn't know where she was and everyone was stressed around her. It was really hard.” (ID 09, child with end stage kidney failure)                                                                                           |
|                                                                                        | “The other annoying thing is siblings can't come to appointments. So I've got a three year old, which is quite a problem, so I am constantly having to try and find people to mind him and put him in extra day care which is also money.” (ID 08, child with mid-aortic syndrome)                           |
| <b>The impact of COVID-19 on support for families of children with chronic illness</b> |                                                                                                                                                                                                                                                                                                              |
| <b>Summary</b>                                                                         | <b>Quote</b>                                                                                                                                                                                                                                                                                                 |
| Family support became unavailable                                                      | “My mother-in-law said, ‘I’m happy to give you a break, come up and stay with him in hospital’. But because of COVID I just thought it was too risky. COVID’s been crap. It’s made things incredibly difficult. It’s made a really s**t situation even more difficult.” (ID 02, child with rhabdomyosarcoma) |
| Loss of support from charities                                                         | “This is also the first time we had to ever pay for accommodation in 6 years. My husband stays at Ronald McDonald House and I always stay with [my daughter]. So that was a massive impact on us too.” (ID 09, child with end stage kidney failure, husband had also lost his job in the pandemic).          |
|                                                                                        | “I think the biggest loss for my son was the fact that Starlight had closed. That was really the worst. I think the Starlight                                                                                                                                                                                |

|                                     |                                                                                                                                                                                                                                                                                                                                                                                                                                                                                                                                                                                       |
|-------------------------------------|---------------------------------------------------------------------------------------------------------------------------------------------------------------------------------------------------------------------------------------------------------------------------------------------------------------------------------------------------------------------------------------------------------------------------------------------------------------------------------------------------------------------------------------------------------------------------------------|
|                                     | Captains pushed to be able to continue seeing the kids at least in the wards, which made a huge difference. I mean Starlight is so critical I think for all those kids.” (ID 02, child with rhabdomyosarcoma)                                                                                                                                                                                                                                                                                                                                                                         |
| Support within the hospital         | “So I think what’s been provided by the hospital in terms of support for the kids has been amazing, I can’t fault that, I think whatever was happening before, they really upped their game to keep that going so it all seems to be run really well.” (ID 11, child with acute lymphoblastic leukemia)                                                                                                                                                                                                                                                                               |
| Social support                      | “I think people can understand a little bit more that fear that you do have as a chronic disease parent. Prior to COVID people have no clue what it is to be fearful for their child or their own health. ...Now they've been faced with this fear that there is something out there that could kill our family. There have been a few comments from people like “Wow, how have you been able to do it, it's so scary and you live in such an uncertain way!”. And like in a funny way I think other people are a little bit more aware and thoughtful.” (ID 10, child with epilepsy) |
| COVID-19 interruptions to education |                                                                                                                                                                                                                                                                                                                                                                                                                                                                                                                                                                                       |
| Summary                             | Quote                                                                                                                                                                                                                                                                                                                                                                                                                                                                                                                                                                                 |
| Home-schooling period extended      | “I could send him to school, but I’m just conscious of the fact that I don’t want him to catch COVID if that’s going to compromise any opportunity for surgery.” (ID 13, child with epilepsy (cortical dysplasia))                                                                                                                                                                                                                                                                                                                                                                    |

|                                                     |                                                                                                                                                                                                                                                                                                                                                                                                                                                          |
|-----------------------------------------------------|----------------------------------------------------------------------------------------------------------------------------------------------------------------------------------------------------------------------------------------------------------------------------------------------------------------------------------------------------------------------------------------------------------------------------------------------------------|
| Impact on siblings' education                       | <p>“I had to balance the need to protect [my child with a chronic illness] with his brother’s wellbeing. We kept [our healthy child] back from school and that was based on my anxiety, ...but I got to a point where I thought there needs to be a balance between looking after his little brother and him. It’s not right for him to be home like this if everyone else is back.” (ID 02, child with rhabdomyosarcoma)</p>                            |
| Limited teacher-parent communication                | <p>“I do wonder if it wasn’t a COVID environment ...whether we’d have had more direct access to the teachers and [it would’ve been] easier to manage. I feel like even the sort of casual conversations like, ‘Has [my son] done anything unusual at school, have you seen any unusual behaviour?’ those sorts of conversations [would’ve been] different ...if it wasn’t in a COVID environment.” (ID 13, child with epilepsy (cortical dysplasia))</p> |
| Burden of chronically ill children on limited staff | <p>“I don’t feel like it’s appropriate for me to be putting a child with special needs in a school that’s got limited staff. I just think if he was going to have a seizure at school, which would normally happen every day before this recent lockdown, it’s just not fair on the teachers or the other kids.” (ID 13, child with epilepsy (cortical dysplasia))</p>                                                                                   |
| Pandemic initiatives supporting learning            | <p>“There's an organization through the US called Outschool [and] we started putting him in some classes. So all these little things that have sprung up have actually been really good.” (ID 04, child with acute lymphoblastic leukemia)</p>                                                                                                                                                                                                           |

|                                              |                                                                                                                                                                                                                                                                                                                                                                                                                   |
|----------------------------------------------|-------------------------------------------------------------------------------------------------------------------------------------------------------------------------------------------------------------------------------------------------------------------------------------------------------------------------------------------------------------------------------------------------------------------|
| <p>Pandemic impact impacted all children</p> | <p>“We are lucky that we had done distance education before ... we sort of knew what was going on to an extent and were able to manage it. Whereas then I've talked to parents [of healthy children] and they are struggling because they've never had kids in the house so long!” (ID 10, child with epilepsy)</p>                                                                                               |
| <p>Hygiene at school</p>                     | <p>“Definitely the silver lining was having [my daughter] at school and knowing that it was a very clean environment and as safe as it probably could be. I also know that teachers were sending sick children home and parents were mostly keeping them at home. They're all using hand sanitizer. Its almost the school made for [my daughter] at the moment.” (ID 09, child with end stage kidney failure)</p> |
|                                              | <p>“Especially at schools ... I'm sure the children never used to wash their hands before, and now they have to several times a day. ... It was really, really good in a way because every little viral illness can cause or trigger a relapse. [But] she hasn't really been sick all year, so she hasn't had a relapse for 6-7 months.” (ID 03, child with nephrotic syndrome)</p>                               |
|                                              | <p>“So a positive [was] last year we actually [were] stable medically. Just because of the lack of viral infections going around. Learning about hand washing at school, social distancing, everyone was wearing a mask, more acceptable classroom environment. So it just reduced the viral exposure, which meant we could commence with her treatment. So we</p>                                                |

|  |                                                                 |
|--|-----------------------------------------------------------------|
|  | just had a really good 12 months.” (ID 10, child with epilepsy) |
|--|-----------------------------------------------------------------|

616



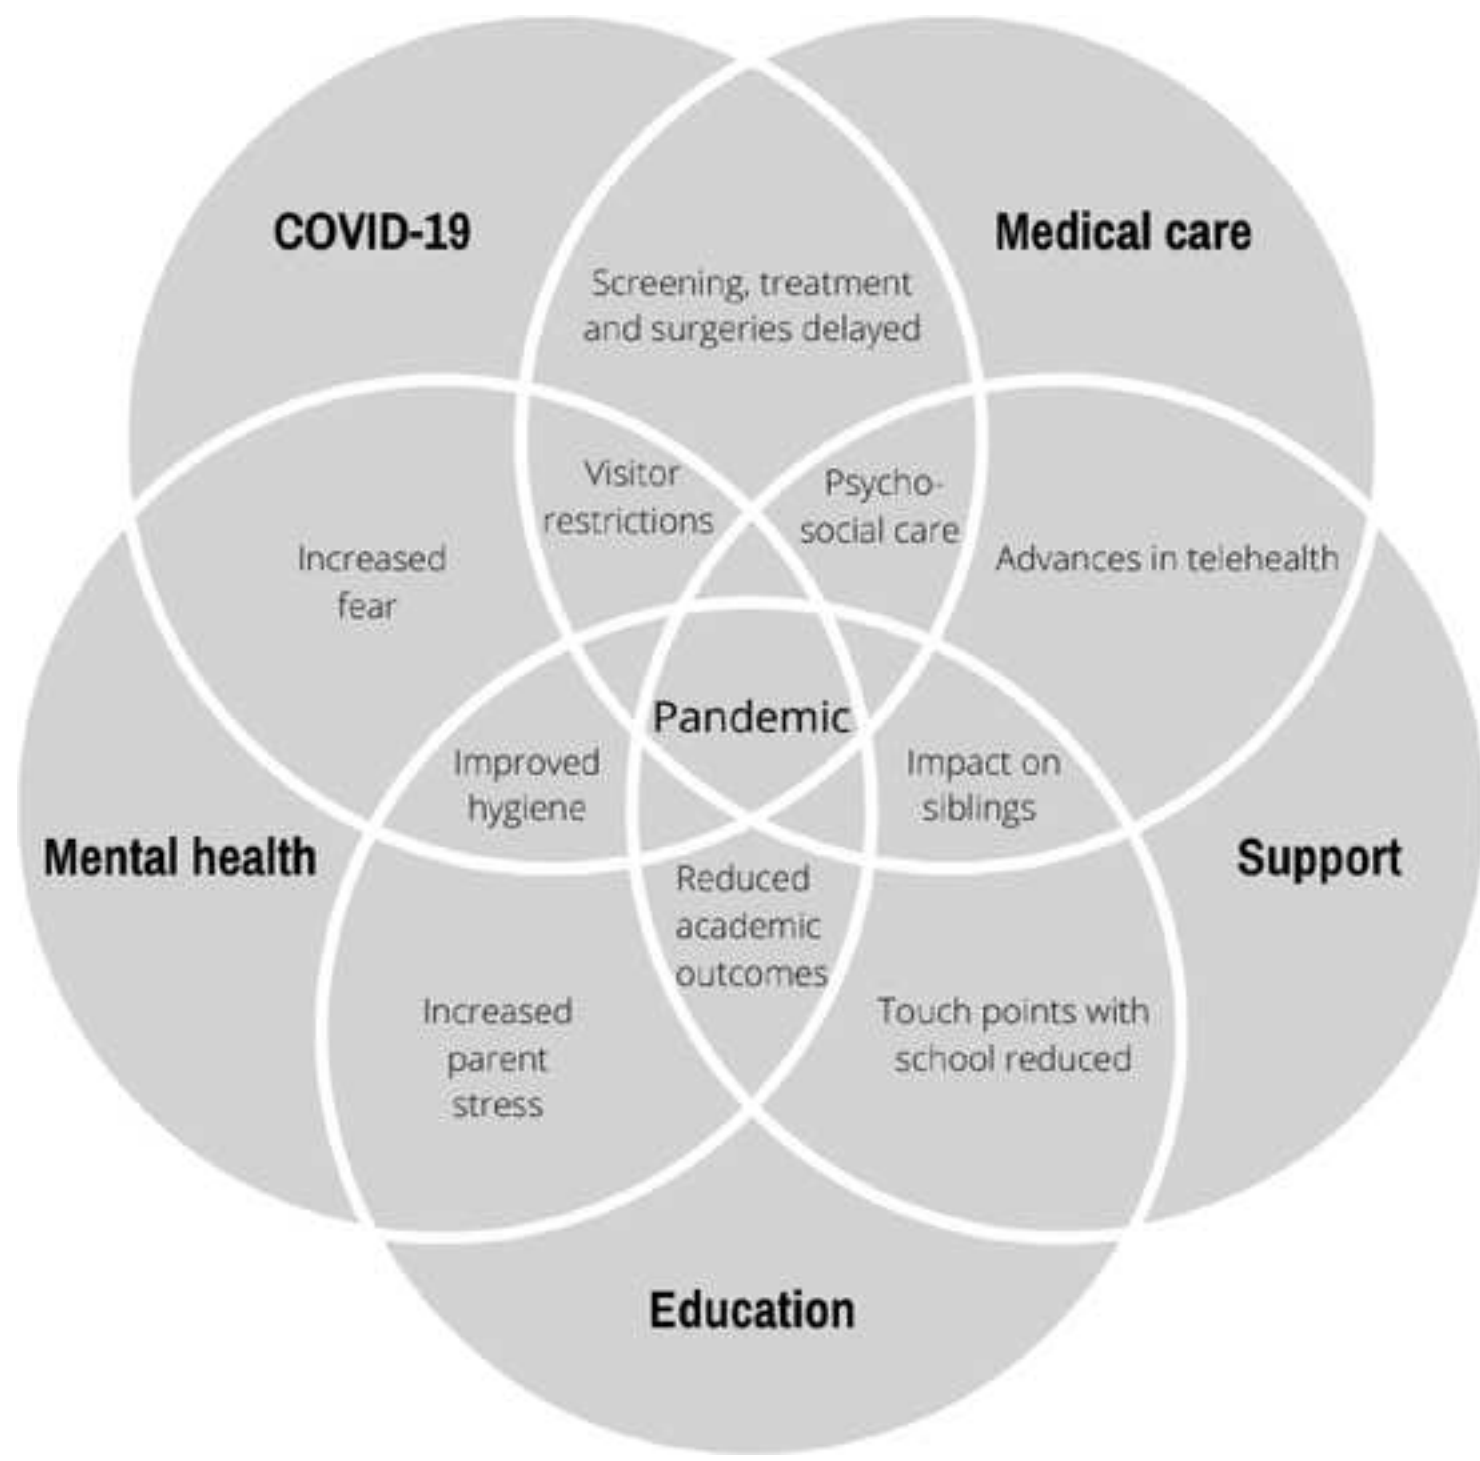

Supplement: pone.0273622.s002.pdf [file pone.0273622.s002.pdf]
